# Supplementary material for: Atmospheric-pressure synthesis of glycerol carbonate from CO2 and glycerol catalyzed by protic ionic liquids
Source: Royal Society of Chemistry journal article supplement (doi:10.1039/d2gc02674k), 2022-01-01
Supplement: d2gc02674k1.pdf [file d2gc02674k1.pdf]

## Supplementary Information

for

### **Atmospheric-pressure synthesis of glycerol carbonate from CO<sub>2</sub> and glycerol catalyzed by protic ionic liquids**

#### **Table of contents**

|                                                                                                |     |
|------------------------------------------------------------------------------------------------|-----|
| 1. Influence of different reaction conditions on the one-pot reaction .....                    | S2  |
| 2. <sup>13</sup> C NMR, <sup>1</sup> H NMR and FT-IR spectra during the one-pot reaction ..... | S5  |
| 3. Recycling and thermal stability of HDBUI .....                                              | S8  |
| 4. Reaction mechanism studies .....                                                            | S11 |
| 5. Water tolerance .....                                                                       | S16 |
| 6. <sup>1</sup> H NMR spectra of protic ILs .....                                              | S18 |

## 1. Influence of different reaction conditions on the one-pot reaction

$$\text{Carbon balance}_{\text{SO}} (\%) = \frac{\text{mol}_{\text{SO, unreacted}} + \text{mol}_{\text{SG}} + \text{mol}_{\text{SC}}}{\text{mol}_{\text{SO, initial}}} \quad (\text{S1})$$

$$\text{Carbon balance}_{\text{Gly}} (\%) = \frac{\text{mol}_{\text{Gly, unreacted}} + \text{mol}_{\text{GC}}}{\text{mol}_{\text{Gly, initial}}} \quad (\text{S2})$$

**Table S1.** One-pot synthesis of GC from CO<sub>2</sub>, Gly, and SO catalyzed by protic ILs.

| Entry | Catalyst           | Conv. (%) |    | Yield (%)       |                 |                 | Products (mmol) |     |      | Carbon balance (%) |     |
|-------|--------------------|-----------|----|-----------------|-----------------|-----------------|-----------------|-----|------|--------------------|-----|
|       |                    | Gly       | SO | SC <sup>a</sup> | SG <sup>a</sup> | GC <sup>b</sup> | SC              | SG  | GC   | SO                 | Gly |
| 1     | HDBUI              | 92        | 84 | 39              | 34              | 86              | 3.0             | 2.6 | 2.2  | 91                 | 94  |
| 2     | HDBUBr             | 77        | 49 | 14              | 28              | 68              | 1.1             | 2.1 | 1.7  | 93                 | 92  |
| 3     | HDBUCI             | 29        | 18 | 2               | 11              | 24              | 0.1             | 0.8 | 0.6  | 95                 | 96  |
| 4     | HDBNI              | 92        | 87 | 48              | 33              | 84              | 3.6             | 2.5 | 2.1  | 95                 | 93  |
| 5     | HDBNBr             | 83        | 57 | 22              | 29              | 75              | 1.6             | 2.2 | 1.9  | 93                 | 92  |
| 6     | HDBNCl             | 36        | 21 | 1               | 11              | 27              | 0.1             | 0.9 | 0.7  | 92                 | 91  |
| 7     | HMTBDI             | 92        | 83 | 42              | 37              | 85              | 3.2             | 2.8 | 2.1  | 96                 | 93  |
| 8     | HTBDI              | 91        | 85 | 41              | 37              | 85              | 3.1             | 2.8 | 2.1  | 93                 | 94  |
| 9     | HDMAPI             | 91        | 87 | 41              | 35              | 80              | 3.0             | 2.6 | 2.0  | 89                 | 89  |
| 10    | HPyI               | 90        | 81 | 43              | 33              | 79              | 3.2             | 2.4 | 2.0  | 94                 | 89  |
| 11    | DBU                | 28        | 28 | 2               | 12              | 21              | 0.2             | 0.9 | 0.5  | 86                 | 94  |
| 12    | DBN                | 8         | 12 | <1              | 6               | 8               | <0.1            | 0.5 | 0.2  | 96                 | >99 |
| 13    | TEA                | 13        | 20 | <1              | 8               | 13              | <0.1            | 0.6 | 0.4  | 90                 | >99 |
| 14    | NaOCH <sub>3</sub> | <1        | 13 | <1              | 3               | <1              | <0.1            | 0.3 | <0.1 | 91                 | >99 |
| 15    | NaOH               | 10        | 16 | <1              | 6               | 5               | <0.1            | 0.4 | 0.1  | 90                 | 95  |
| 16    | KOH                | <1        | 12 | <1              | 4               | <1              | <0.1            | 0.3 | <0.1 | 92                 | >99 |

Reaction conditions: 0.1 MPa of CO<sub>2</sub> (balloon), Gly (2.5 mmol), SO (7.5 mmol), catalyst loading (5 mol% based on Gly), 100 °C, 4 h. <sup>a</sup> Based on SO. <sup>b</sup> Based on Gly.

**Table S2.** Effect of reaction time on GC synthesis by the one-pot reaction at 0.1 MPa of CO<sub>2</sub>.

| Entry | Reaction time (h) | Conv. (%) |    | Yield (%)       |                 |                 | Products (mmol) |     |     | Carbon balance (%) |     |
|-------|-------------------|-----------|----|-----------------|-----------------|-----------------|-----------------|-----|-----|--------------------|-----|
|       |                   | Gly       | SO | SC <sup>a</sup> | SG <sup>a</sup> | GC <sup>b</sup> | SC              | SG  | GC  | SO                 | Gly |
|       |                   |           |    |                 |                 |                 |                 |     |     |                    |     |
| 1     | 1                 | 73        | 42 | 12              | 24              | 70              | 0.9             | 1.8 | 1.8 | 94                 | 98  |
| 2     | 2                 | 89        | 69 | 36              | 32              | 83              | 2.7             | 2.4 | 2.1 | 99                 | 94  |
| 3     | 4                 | 92        | 84 | 39              | 34              | 86              | 3.0             | 2.6 | 2.2 | 91                 | 94  |
| 4     | 6                 | 91        | 89 | 46              | 35              | 88              | 3.6             | 2.6 | 2.2 | 92                 | 98  |
| 5     | 8                 | 91        | 97 | 55              | 36              | 91              | 4.1             | 2.6 | 2.3 | 94                 | >99 |
| 6     | 10                | 91        | 96 | 54              | 38              | 90              | 4.1             | 2.9 | 2.2 | 96                 | >99 |

Reaction conditions: 0.1 MPa of CO<sub>2</sub> (balloon), Gly (2.5 mmol), SO (7.5 mmol), catalyst loading (5 mol% based on Gly), 100 °C. <sup>a</sup> Based on SO. <sup>b</sup> Based on Gly.

**Table S3.** Effect of reaction temperature on GC synthesis by the one-pot reaction at 0.1 MPa of CO<sub>2</sub>.

| Entry | Reaction temperature (°C) | Conv. (%) |    | Yield (%)       |                 |                 | Products (mmol) |     |     | Carbon balance (%) |     |
|-------|---------------------------|-----------|----|-----------------|-----------------|-----------------|-----------------|-----|-----|--------------------|-----|
|       |                           | Gly       | SO | SC <sup>a</sup> | SG <sup>a</sup> | GC <sup>b</sup> | SC              | SG  | GC  | SO                 | Gly |
|       |                           |           |    |                 |                 |                 |                 |     |     |                    |     |
| 1     | 60                        | 85        | 61 | 24              | 33              | 75              | 1.9             | 2.5 | 1.9 | 96                 | 90  |
| 2     | 70                        | 90        | 83 | 46              | 35              | 87              | 3.5             | 2.7 | 2.2 | 98                 | 97  |
| 3     | 80                        | 90        | 92 | 52              | 34              | 86              | 3.9             | 2.6 | 2.1 | 94                 | 96  |
| 4     | 90                        | 90        | 92 | 49              | 34              | 88              | 3.7             | 2.6 | 2.2 | 92                 | 98  |
| 5     | 100                       | 91        | 97 | 55              | 36              | 91              | 4.1             | 2.6 | 2.3 | 94                 | >99 |
| 6     | 110                       | 90        | 97 | 50              | 34              | 89              | 3.8             | 2.6 | 2.2 | 87                 | 99  |

Reaction conditions: 0.1 MPa of CO<sub>2</sub> (balloon), Gly (2.5 mmol), SO (7.5 mmol), catalyst loading (5 mol% based on Gly), 8 h. <sup>a</sup> Based on SO. <sup>b</sup> Based on Gly.

**Table S4.** Effect of catalyst loading on GC synthesis by the one-pot reaction at 0.1 MPa of CO<sub>2</sub>.

| Entry | Catalyst loading (%) | Conv. (%) |    | Yield (%)       |                 |                 | Products (mmol) |     |     | Carbon balance (%) |     |
|-------|----------------------|-----------|----|-----------------|-----------------|-----------------|-----------------|-----|-----|--------------------|-----|
|       |                      | Gly       | SO | SC <sup>a</sup> | SG <sup>a</sup> | GC <sup>b</sup> | SC              | SG  | GC  | SO                 | Gly |
|       |                      | 1         | 1  | 77              | 53              | 15              | 29              | 70  | 1.2 | 2.2                | 1.7 |
| 2     | 2.5                  | 88        | 89 | 42              | 33              | 84              | 3.1             | 2.4 | 2.1 | 86                 | 96  |
| 3     | 5                    | 91        | 97 | 55              | 36              | 91              | 4.1             | 2.6 | 2.3 | 94                 | >99 |
| 4     | 7.5                  | 90        | 97 | 51              | 38              | 90              | 3.8             | 2.8 | 2.3 | 92                 | >99 |

Reaction conditions: 0.1 MPa of CO<sub>2</sub> (balloon), Gly (2.5 mmol), SO (7.5 mmol), 100 °C, 8 h. <sup>a</sup> Based on SO. <sup>b</sup> Based on Gly.

**Table S5.** Effect of SO/Gly molar ratio on GC synthesis by the one-pot reaction at 0.1 MPa of CO<sub>2</sub>.

| Entry | SO/Gly molar ratio | Conv. (%) |    | Yield (%)       |                 |                 | Products (mmol) |     |     | Carbon balance (%) |     |
|-------|--------------------|-----------|----|-----------------|-----------------|-----------------|-----------------|-----|-----|--------------------|-----|
|       |                    | Gly       | SO | SC <sup>a</sup> | SG <sup>a</sup> | GC <sup>b</sup> | SC              | SG  | GC  | SO                 | Gly |
|       |                    | 1         | 1  | 63              | 97              | 21              | 62              | 58  | 0.6 | 1.7                | 1.5 |
| 2     | 2                  | 83        | 97 | 40              | 52              | 81              | 2.0             | 2.6 | 2   | 94                 | 98  |
| 3     | 3                  | 91        | 97 | 55              | 36              | 91              | 4.1             | 2.6 | 2.3 | 94                 | >99 |
| 4     | 4                  | 95        | 92 | 55              | 29              | 95              | 5.6             | 3.0 | 2.4 | 92                 | >99 |

Reaction conditions: 0.1 MPa of CO<sub>2</sub> (balloon), Gly (2.5 mmol), catalyst loading (5 mol% based on Gly), 100 °C, 8 h. <sup>a</sup> Based on SO. <sup>b</sup> Based on Gly.

## 2. $^{13}\text{C}$ NMR, $^1\text{H}$ NMR and FT-IR spectra during the one-pot reaction

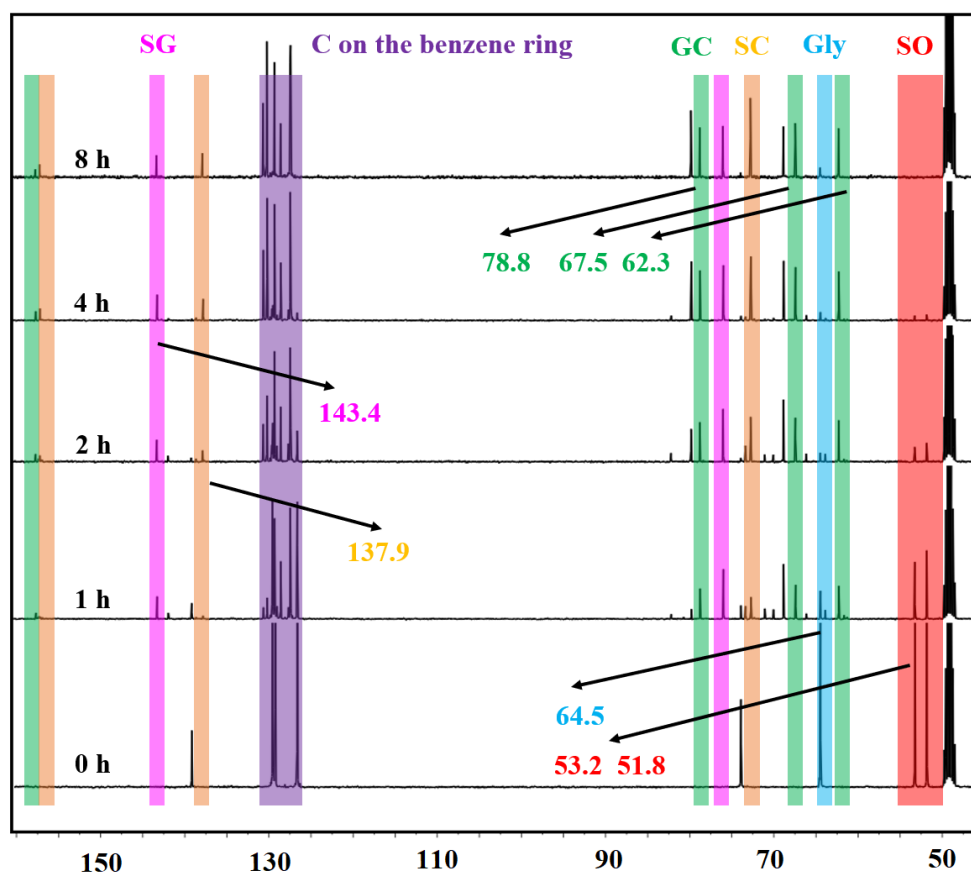

**Fig. S1**  $^{13}\text{C}$  NMR spectra of reaction mixture during the one-pot reaction (100 MHz  $\text{CD}_4\text{O}$ ).

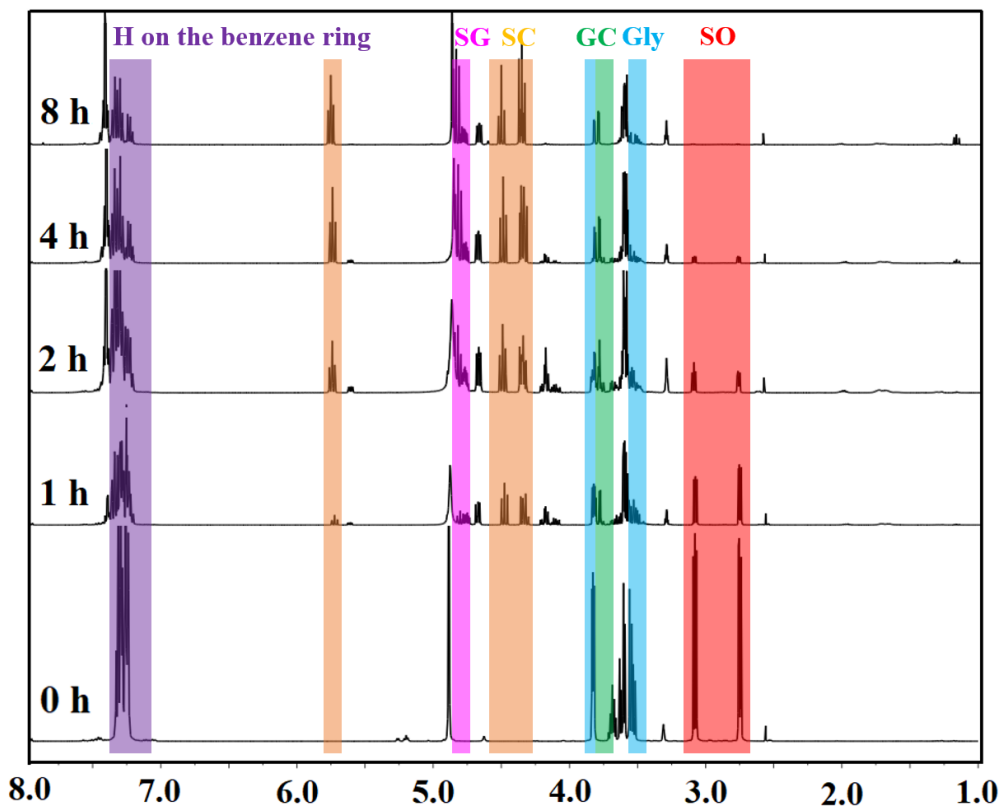

**Fig. S2** <sup>1</sup>H NMR spectra of the reaction mixture during the one-pot reaction (400 MHz CD<sub>4</sub>O).

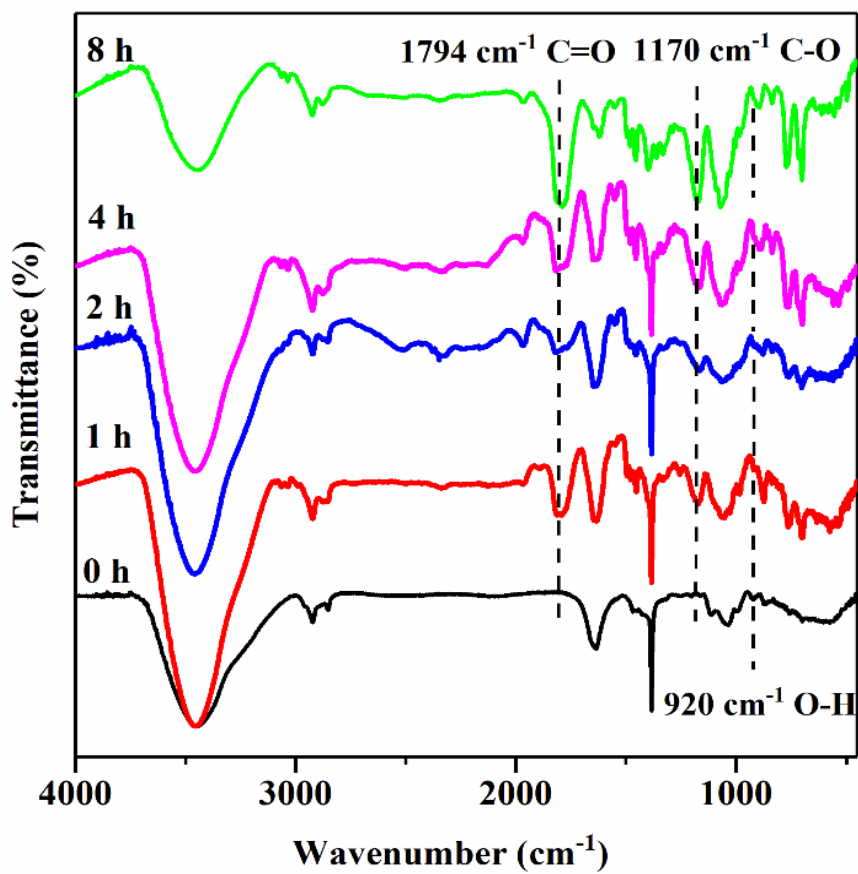

**Fig. S3** FT-IR of the reaction mixture during the one-pot reaction.

### 3. Recycling and thermal stability of HDBUI

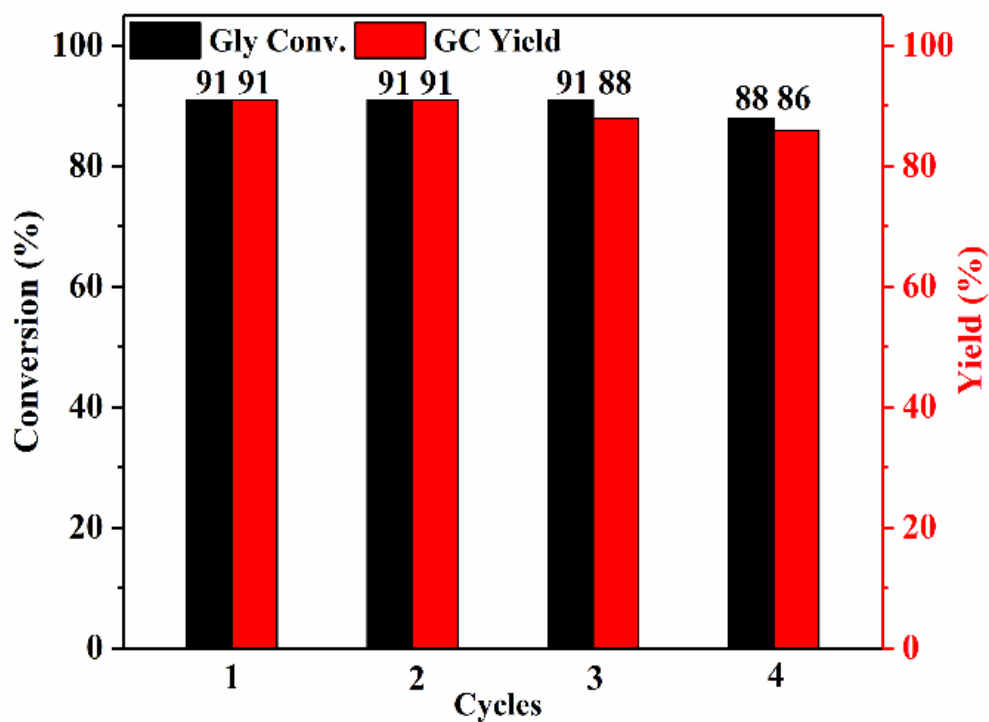

**Fig. S4** Catalyst recycling for the one-pot reaction. Conditions: 0.1 MPa of CO<sub>2</sub> (balloon), Gly (2.5 mmol), SO (7.5 mmol), catalyst loading (10 mol% based on Gly), 100 °C, 4 h.



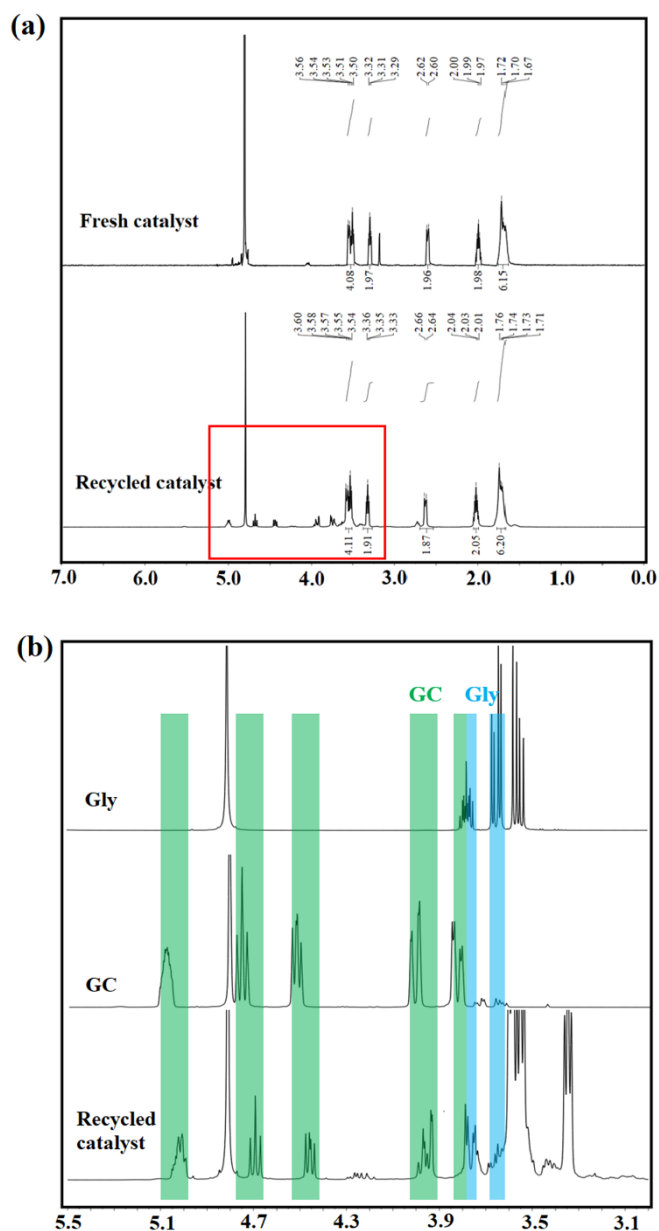

**Fig. S5** <sup>1</sup>H NMR spectra of (a) the catalyst before and after the cycle, (b) Gly, GC and the catalyst after the cycle (400 MHz, D<sub>2</sub>O).

<sup>1</sup>H NMR spectra of recycled catalyst demonstrated no significant variation of HDBUI (**Fig. S5a**). A small amount of impurities in the recovered catalyst is Gly and GC that are difficult to be completely separated (**Fig. S5b**).

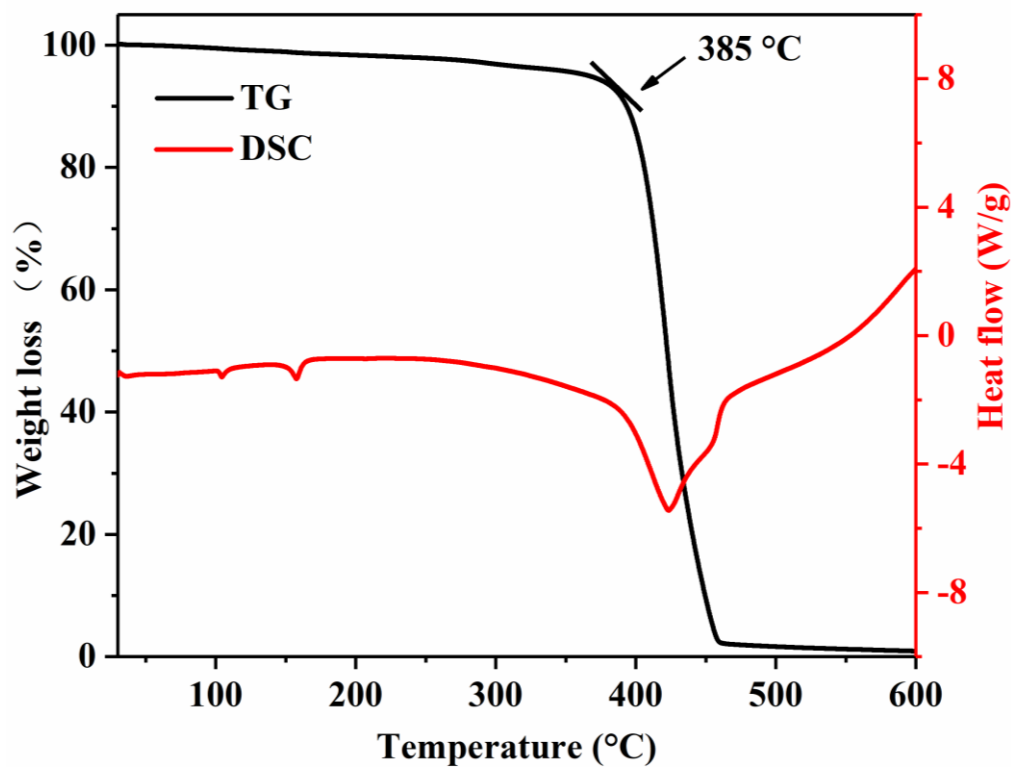

**Fig. S6** The TG and DSC curves of HDBUI.

## 4. Reaction mechanism studies

**Table S6.** Cycloaddition of CO<sub>2</sub> and SO catalyzed by protic ILs.

---

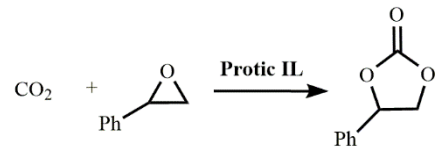

CO<sub>2</sub> +   $\xrightarrow{\text{Protic IL}}$  

| Entry | Catalyst | SO conv.<br>(%) | SC yield <sup>a</sup><br>(%) | SC<br>(mmol) | Carbon balance of SO<br>(%) |
|-------|----------|-----------------|------------------------------|--------------|-----------------------------|
| 1     | HDBUI    | 88              | 88                           | 6.8          | >99                         |
| 2     | HDBUBr   | 80              | 80                           | 6.0          | >99                         |
| 3     | HDBUCl   | 60              | 53                           | 4.0          | 93                          |
| 4     | HPyI     | 66              | 63                           | 4.8          | 97                          |

---

Reaction conditions: 0.1 MPa of CO<sub>2</sub> (balloon), SO (7.5 mmol), catalyst loading (1.67

mol%), 100 °C, 4 h. <sup>a</sup> Based on SO.

**Table S7.** Transesterification of Gly and SC catalyzed by protic ILs.

The reaction scheme shows glycerol (HO-CH<sub>2</sub>-CH(OH)-CH<sub>2</sub>-OH) reacting with a substituted succinic anhydride (SC) in the presence of a protic ionic liquid (Protic IL) to produce a substituted succinic anhydride (SG) and glycerol (GC).

| Entry | Catalyst | Conv. (%) |    | Yield (%)       |                 | Products (mmol) |      | Carbon balance (%) |     |
|-------|----------|-----------|----|-----------------|-----------------|-----------------|------|--------------------|-----|
|       |          | Gly       | SC | SG <sup>a</sup> | GC <sup>b</sup> | SG              | GC   | SC                 | Gly |
| 1     | HDBUI    | 91        | 35 | 31              | 87              | 2.4             | 2.2  | 97                 | 96  |
| 2     | HDBUBr   | 92        | 33 | 31              | 87              | 2.4             | 2.2  | 99                 | 95  |
| 3     | HDBUCl   | 92        | 35 | 34              | 88              | 2.7             | 2.2  | >99                | 96  |
| 4     | HPyI     | 3         | 1  | 1               | 3               | <0.1            | <0.1 | >99                | >99 |

Reaction conditions: Gly (2.5 mmol), SC (7.5 mmol), catalyst loading (5 mol% based on Gly), 100 °C, 4 h. <sup>a</sup> Based on SC. <sup>b</sup> Based on Gly.

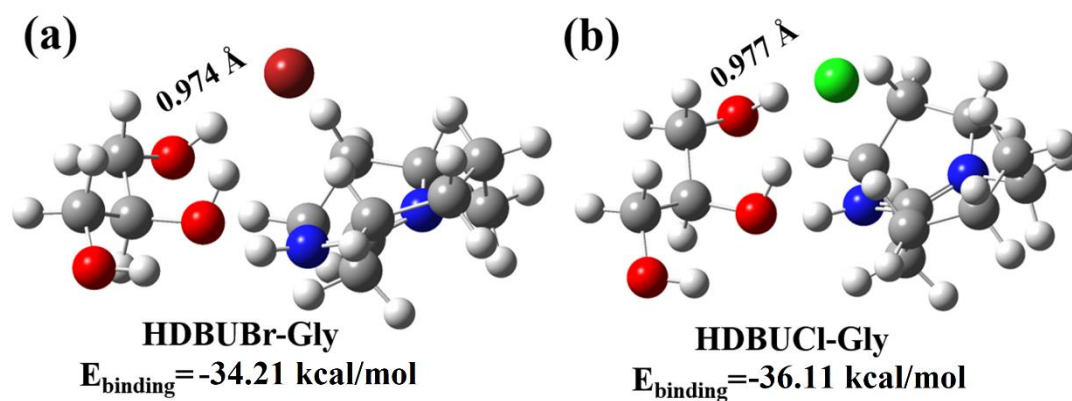

**Fig. S7** The interaction between protic ILs and Gly. (a) HDBUBr-Gly, (b) HDBUCI-Gly.

**Table S8.** Data of optimized structures of protic IL-Gly.

| Protic IL-Gly | O-H (Å) <sup>a</sup> | Binding energy (kcal/mol) |
|---------------|----------------------|---------------------------|
| Gly           | 0.958                | -                         |
| HDBUI-Gly     | 0.973                | -32.49                    |
| HDBUBr-Gly    | 0.974                | -34.21                    |
| HDBUCI-Gly    | 0.977                | -36.11                    |
| HPyI-Gly      | 0.970                | -23.85                    |

<sup>a</sup> Bond length of Gly hydroxyl group activated by the protic ILs.

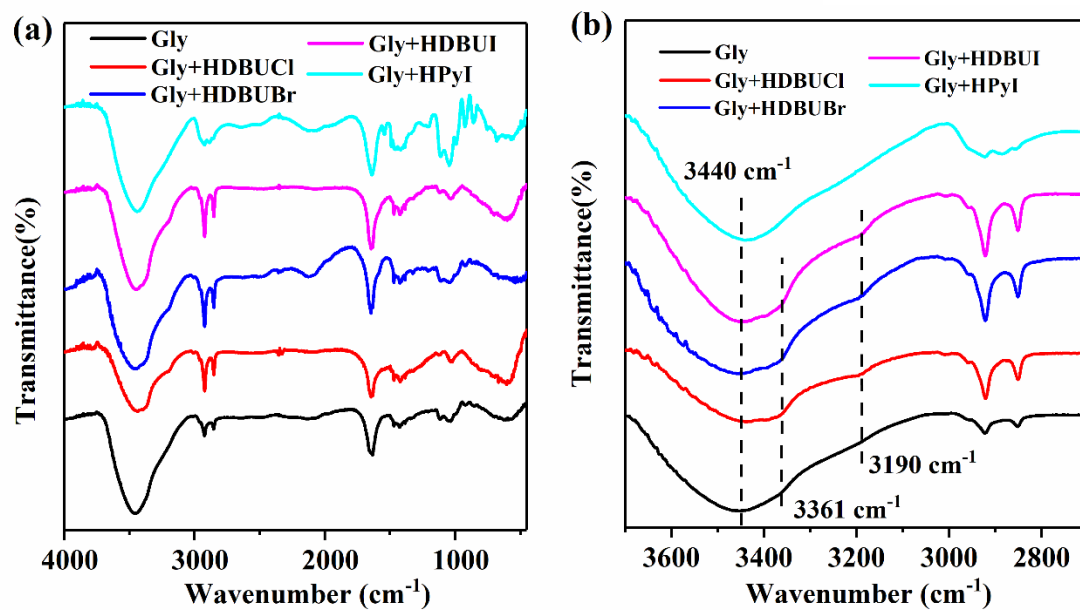

**Fig. S8** FT-IR spectra of Gly, Gly + protic ILs (molar ratio 4:1). (a) 4000  $\text{cm}^{-1}$ –450  $\text{cm}^{-1}$ , (b) 3700  $\text{cm}^{-1}$ –2700  $\text{cm}^{-1}$ .

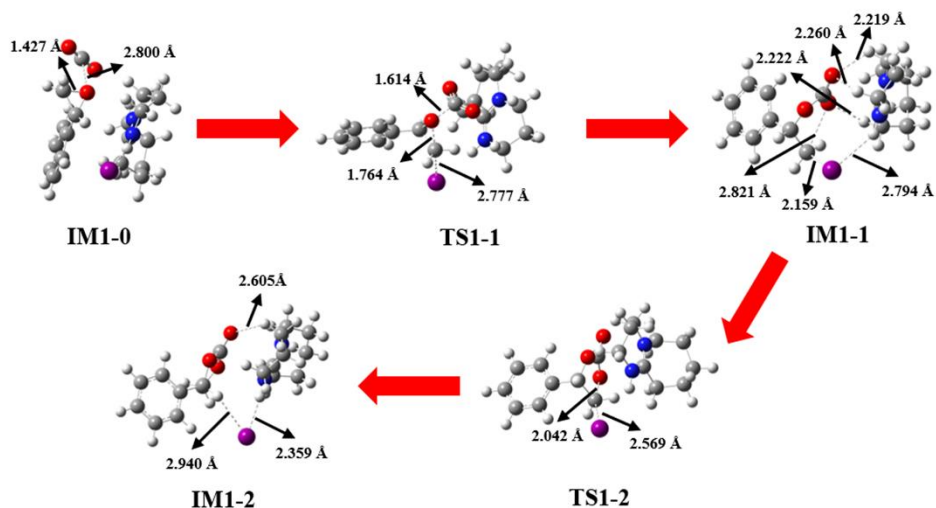

**Fig. S9** The optimized geometries of transition states and intermediates involved HDBUI catalyzed cycloaddition.

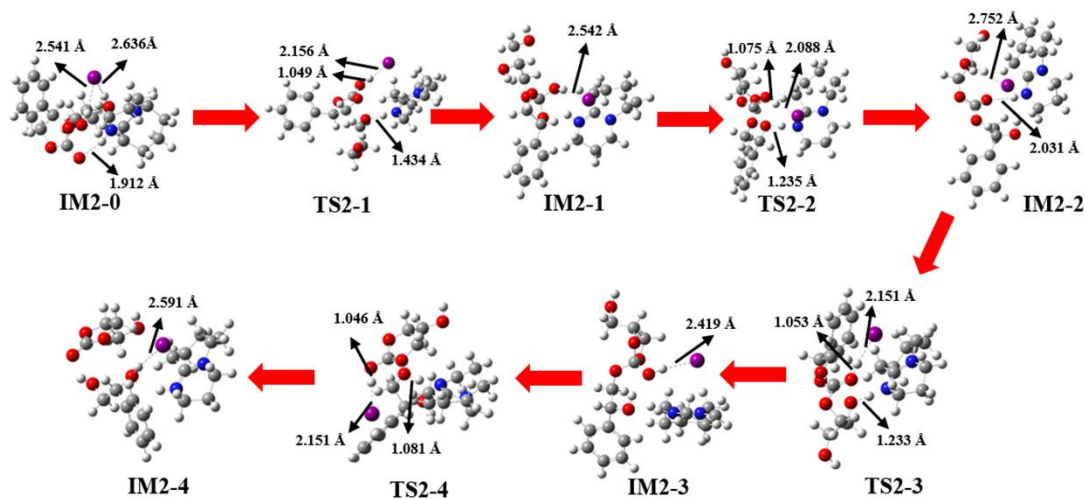

**Fig. S10** The optimized geometries of transition states and intermediates involved HDBUI catalyzed transesterification.

## 5. Water tolerance

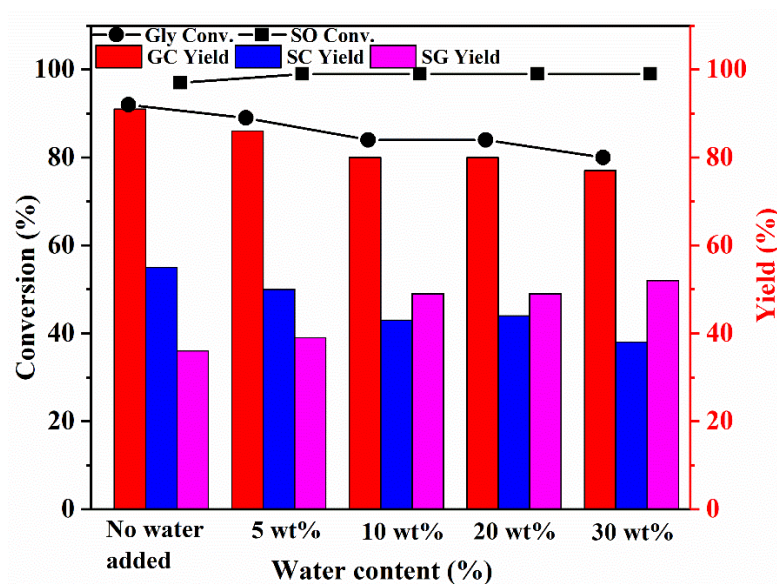

**Fig. S11** Effect of water content in Gly. Reaction conditions: 0.1 MPa of CO<sub>2</sub> (balloon), Gly (2.5 mmol), SO (7.5 mmol), catalyst loading (5 mol% based on Gly), 100 °C, 4 h, water content based on Gly.



**Table S9.** Expansion of reaction conditions for one-pot synthesis of GC catalyzed by HDBUI.

| Entry | Water added (wt%) <sup>a</sup> | Pressure (MPa)                                                                 | Temperature (°C) | Time (h) | GC Yield (%) <sup>b</sup> | Products (mmol) |     |     | Carbon balance (%) |     |
|-------|--------------------------------|--------------------------------------------------------------------------------|------------------|----------|---------------------------|-----------------|-----|-----|--------------------|-----|
|       |                                |                                                                                |                  |          |                           | SC              | SG  | GC  | SO                 | Gly |
| 1     | 5                              | 0.1 (CO <sub>2</sub> )                                                         | 100              | 8        | 86                        | 3.7             | 2.9 | 2.2 | 90                 | 97  |
| 2     | 10                             | 0.1 (CO <sub>2</sub> )                                                         | 100              | 8        | 80                        | 3.2             | 3.7 | 2.0 | 92                 | 96  |
| 3     | 20                             | 0.1 (CO <sub>2</sub> )                                                         | 100              | 8        | 80                        | 3.4             | 3.7 | 2.0 | 94                 | 95  |
| 4     | 30                             | 0.1 (CO <sub>2</sub> )                                                         | 100              | 8        | 77                        | 2.9             | 4.0 | 2.0 | 92                 | 97  |
| 5     | 0                              | 2.0 <sup>c</sup> (15% CO <sub>2</sub> /85% N <sub>2</sub> )                    | 100              | 8        | 81                        | 3.0             | 2.2 | 2.1 | 86                 | 94  |
| 6     | 0                              | 2.0 <sup>c</sup> (15% CO <sub>2</sub> /3% O <sub>2</sub> /82% N <sub>2</sub> ) | 100              | 8        | 80                        | 2.9             | 2.0 | 2.0 | 77                 | 91  |
| 7     | 0                              | 0.1 <sup>d</sup> (50% CO <sub>2</sub> /50% CH <sub>4</sub> )                   | 100              | 8        | 71                        | 0.9             | 2.0 | 1.8 | 80                 | 88  |
| 8     | 0                              | 0.1 (CO <sub>2</sub> )                                                         | 45               | 24       | 75                        | 1.3             | 1.9 | 1.9 | 95                 | 96  |
| 9     | 0                              | 0.1 (CO <sub>2</sub> )                                                         | 45               | 48       | 94                        | 4.2             | 2.4 | 2.3 | 95                 | 99  |

Reaction conditions: Gly (2.5 mmol), SO (7.5 mmol), HDBUI loading (5 mol% based on Gly). <sup>a</sup> Water content based on Gly. <sup>b</sup> Based on Gly. <sup>c</sup> Simulated flue gas. <sup>d</sup> Simulated biogas.

## 6. $^1\text{H}$ NMR spectra of protic ILs

**1,8-Diazabicyclo[5.4.0]undec-7-enium iodide (HDBUI).**  $^1\text{H}$  NMR (400 MHz,  $\text{D}_2\text{O}$ ):  $\delta\text{H}$  (ppm) 3.56-3.50 (m, 4H), 3.31 (t,  $J = 5.8$  Hz, 2H), 2.62–2.60 (m, 2H), 2.00–1.97 (m, 2H), 1.72–1.67 (m, 6H).

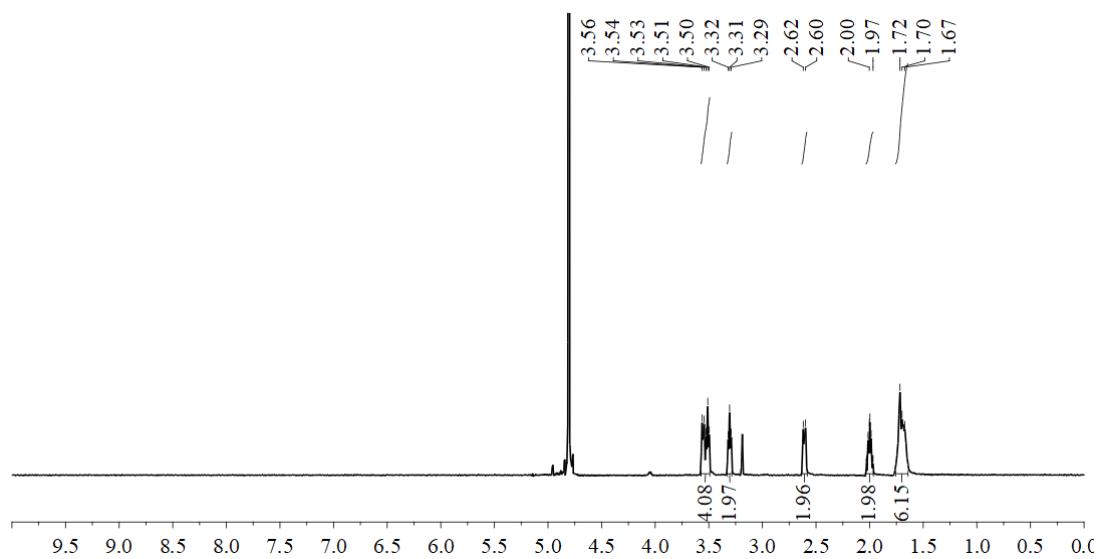

**Fig. S12**  $^1\text{H}$ NMR spectrum of HDBUI.

**1,8-Diazabicyclo[5.4.0]undec-7-enium bromide (HDBUBr).**  $^1\text{H}$  NMR (400 MHz,  $\text{D}_2\text{O}$ ):  $\delta\text{H}$  (ppm) 3.56–3.49 (m, 4H), 3.30 (t,  $J = 5.6$  Hz, 2H), 2.62–2.60 (m, 2H), 2.02–1.96 (m, 2H), 1.71–1.67 (m, 6H).

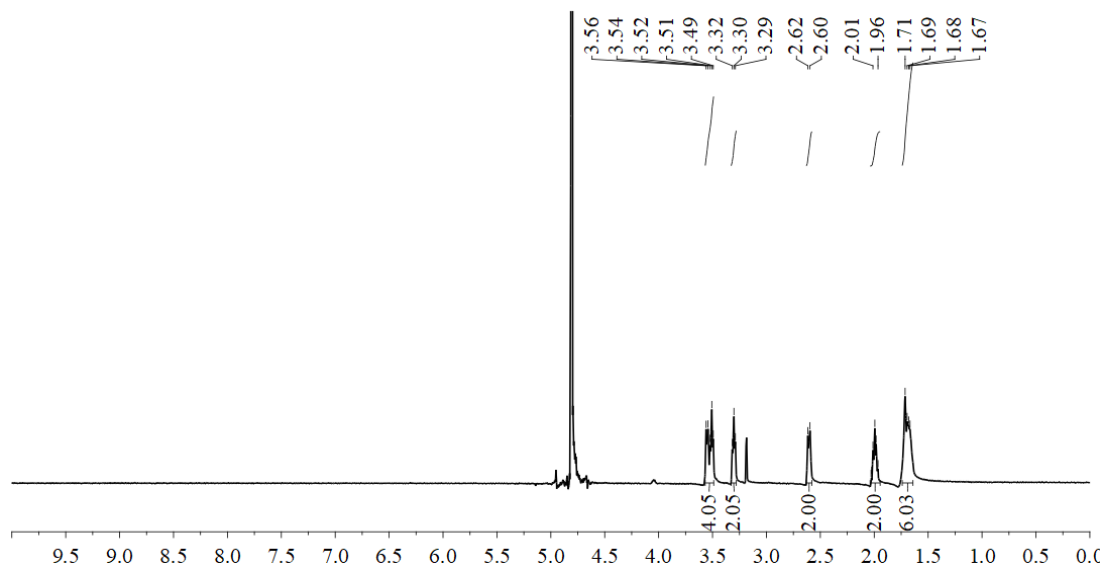

**Fig. S13**  $^1\text{H}$ NMR spectrum of HDBUBr.

**1,8-Diazabicyclo[5.4.0]undec-7-enium chloride (HDBUCl).**  $^1\text{H}$  NMR (400 MHz,  $\text{D}_2\text{O}$ ):  $\delta\text{H}$  (ppm) 3.56–3.50 (m, 4H), 3.31 (t,  $J = 4.8$  Hz, 2H), 2.62–2.60 (m, 2H), 2.00–1.99 (m, 2H), 1.72–1.70 (m, 6H).

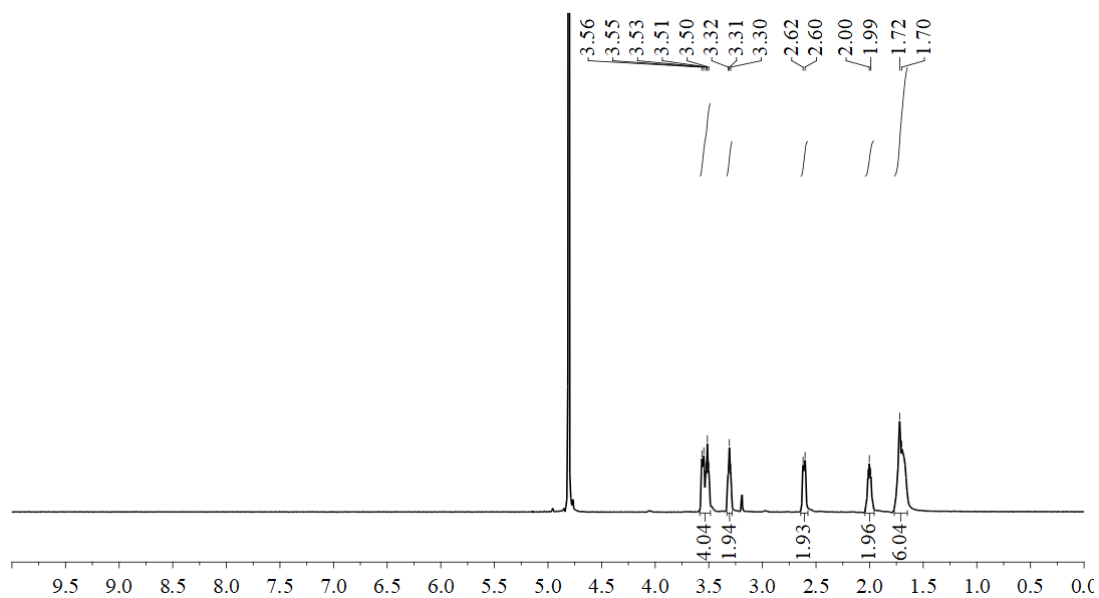

**Fig. S14**  $^1\text{H}$ NMR spectrum of HDBUCl.

**1,5-Diazabicyclo[4.3.0]non-5-enium iodide (HDBNI).**  $^1\text{H}$  NMR (400 MHz,  $\text{D}_2\text{O}$ ):

$\delta\text{H}$  (ppm) 3.67 (t,  $J = 7.4$  Hz, 2H), 3.43–3.35 (m, 4H), 2.84 (t,  $J = 8.0$  Hz, 2H), 2.16–  
2.09 (m, 2H), 2.03 –1.98 (m, 2H).

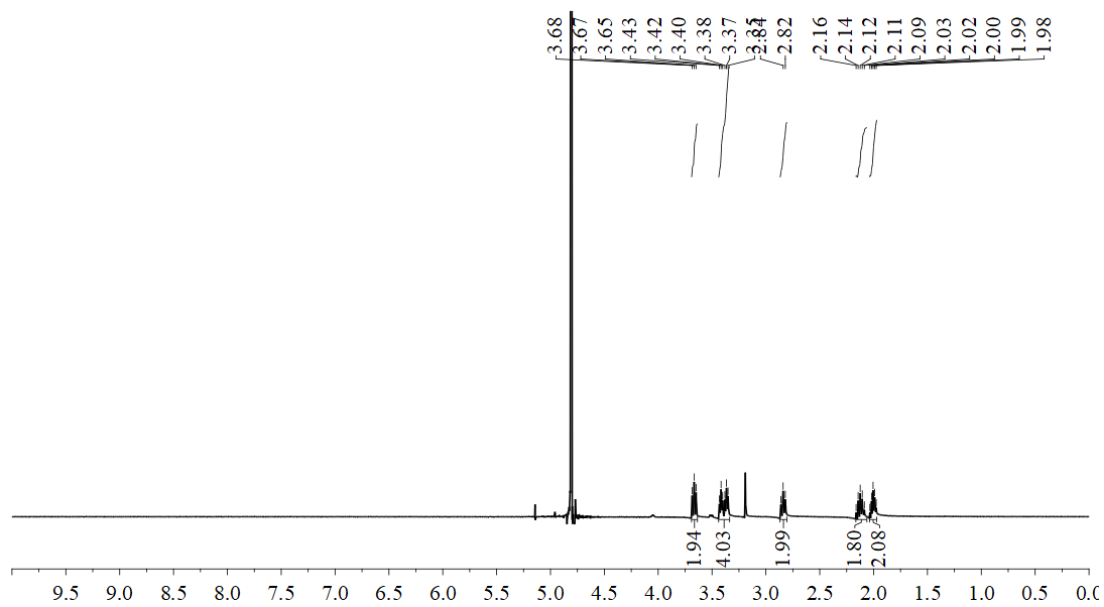

**Fig. S15**  $^1\text{H}$ NMR spectrum of HDBNI.

**1,5-Diazabicyclo[4.3.0]non-5-enium bromide (HDBNBr).**  $^1\text{H}$  NMR (400 MHz,  $\text{D}_2\text{O}$ ):  $\delta\text{H}$  (ppm) 3.67 (t,  $J = 7.4$  Hz, 2H), 3.40–3.38 (m, 4H), 2.84 (t,  $J = 8.0$  Hz, 2H), 2.14–2.08 (m, 2H), 2.03–1.97 (m, 2H).

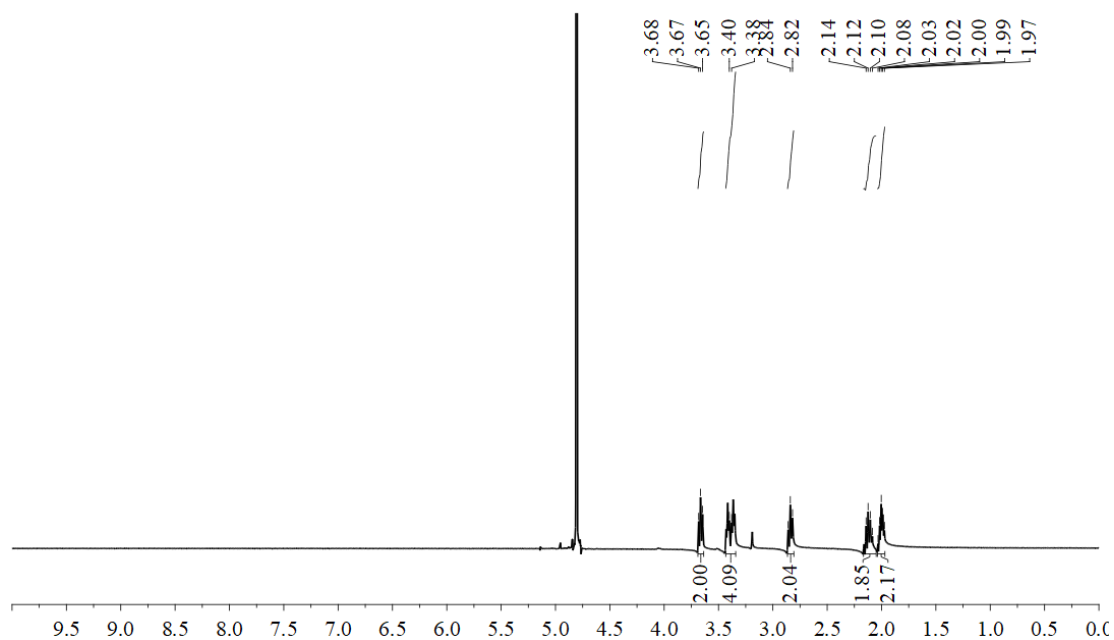

**Fig. S16**  $^1\text{H}$ NMR spectrum of HDBNBr.

**1,5-Diazabicyclo[4.3.0]non-5-enium chloride (HDBNCl).**  $^1\text{H}$  NMR (400 MHz,  $\text{D}_2\text{O}$ ):  $\delta\text{H}$  (ppm) 3.67 (t,  $J = 7.2$  Hz, 2H), 3.41–3.36 (m, 4H), 2.84 (t,  $J = 8.0$  Hz, 2H), 2.16–2.09 (m, 2H), 2.02–1.99 (m, 2H).

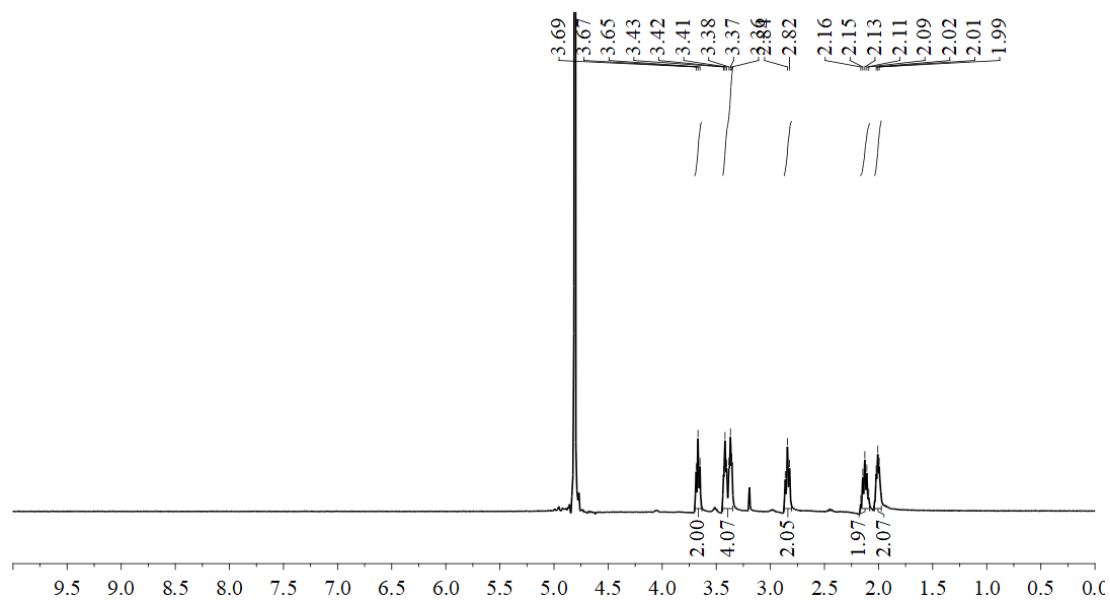

**Fig. S17**  $^1\text{H}$ NMR spectrum of HDBNCl.

**7-Methyl-1,5,7-triazabicyclo[4.4.0]dec-5-enium iodide (HMTBDI).**  $^1\text{H}$  NMR (400 MHz,  $\text{D}_2\text{O}$ ):  $\delta\text{H}$  (ppm) 3.36–3.28 (m, 8H), 2.93 (m, 3H), 2.03–1.97 (m, 2H), 1.97–1.92 (m, 2H).

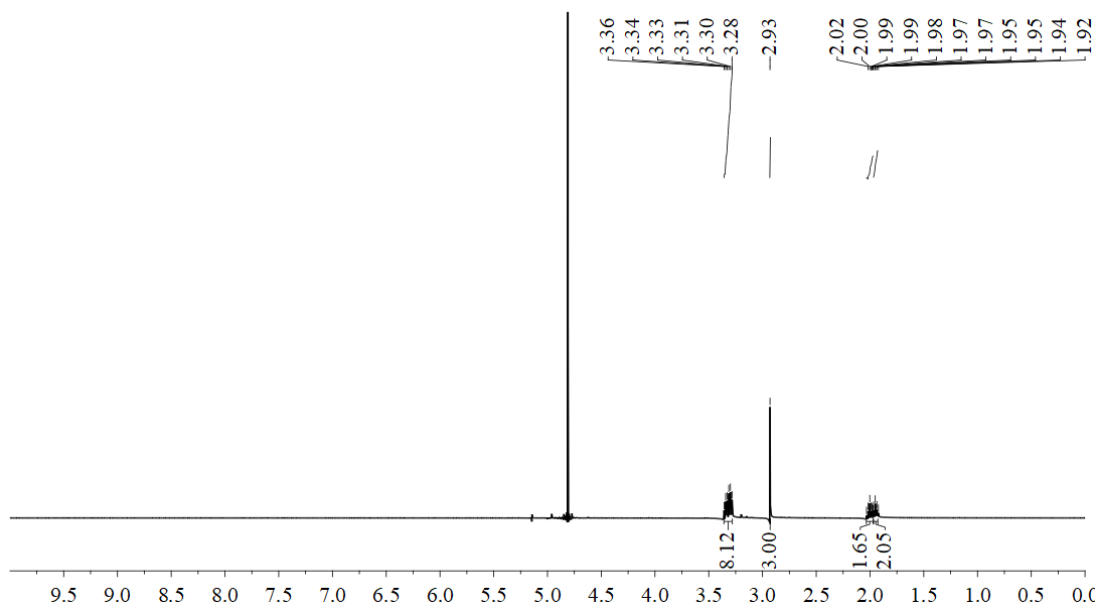

**Fig. S18**  $^1\text{H}$ NMR spectrum of HMTBDI.



**1,5,7-Triazabicyclo[4.4.0]dec-5-enium iodide (HTBDI).**  $^1\text{H}$  NMR (400 MHz,  $\text{D}_2\text{O}$ ):  $\delta\text{H}$  (ppm) 3.33 (t,  $J = 6.0$  Hz, 4H), 3.25 (t,  $J = 5.8$  Hz, 4H), 2.00–1.94 (m, 4H).

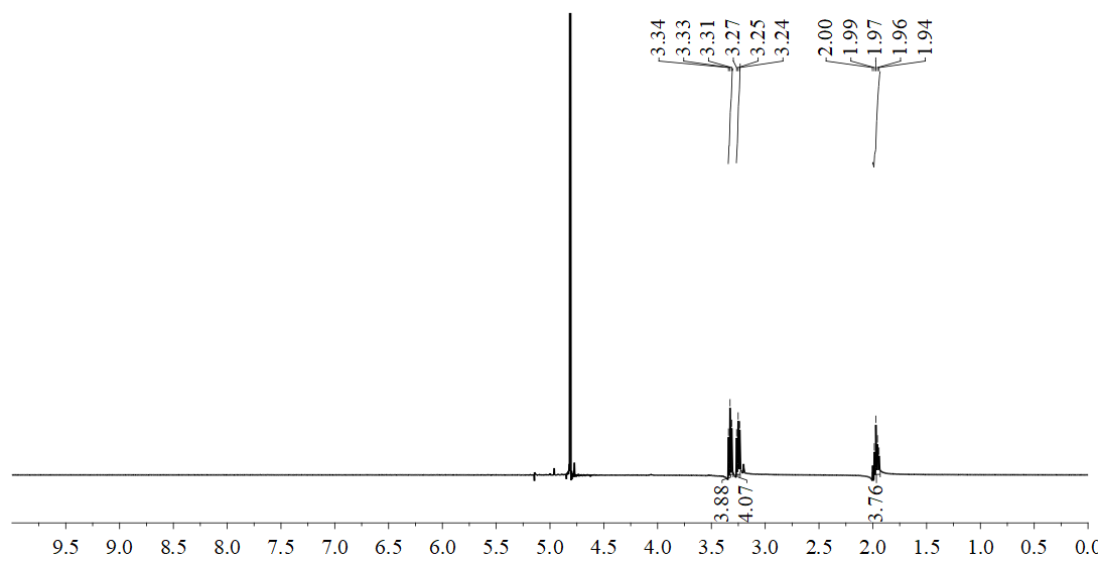

**Fig. S19**  $^1\text{H}$ NMR spectrum of HTBDI.

**4-Dimethylaminopyridinium iodide (HDMAPI).**  $^1\text{H}$  NMR (400 MHz,  $\text{D}_2\text{O}$ ):  $\delta\text{H}$

(ppm) 8.00–7.99 (m, 2H), 6.88–6.86 (m, 2H), 3.20 (m, 6H).

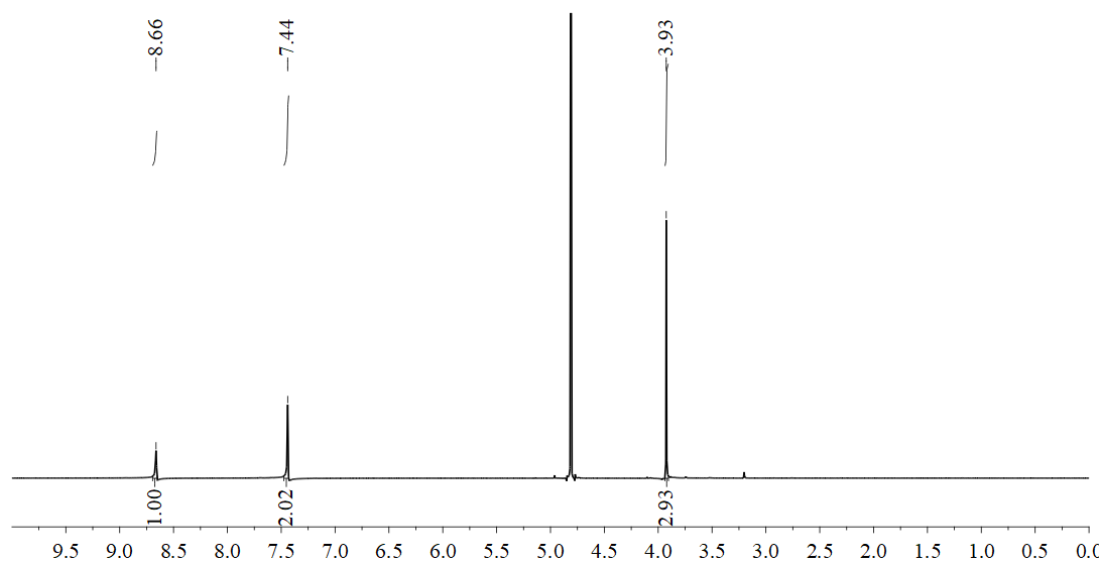

**Fig. S20**  $^1\text{H}$ NMR spectrum of HDMAPI.

**Pyridinium iodide (HPyI).**  $^1\text{H}$  NMR (400 MHz,  $\text{D}_2\text{O}$ ):  $\delta\text{H}$  (ppm) 8.81–8.79 (m, 2H),

8.66–8.62 (m, 1H), 8.09 (t,  $J = 7.0$  Hz, 2H).

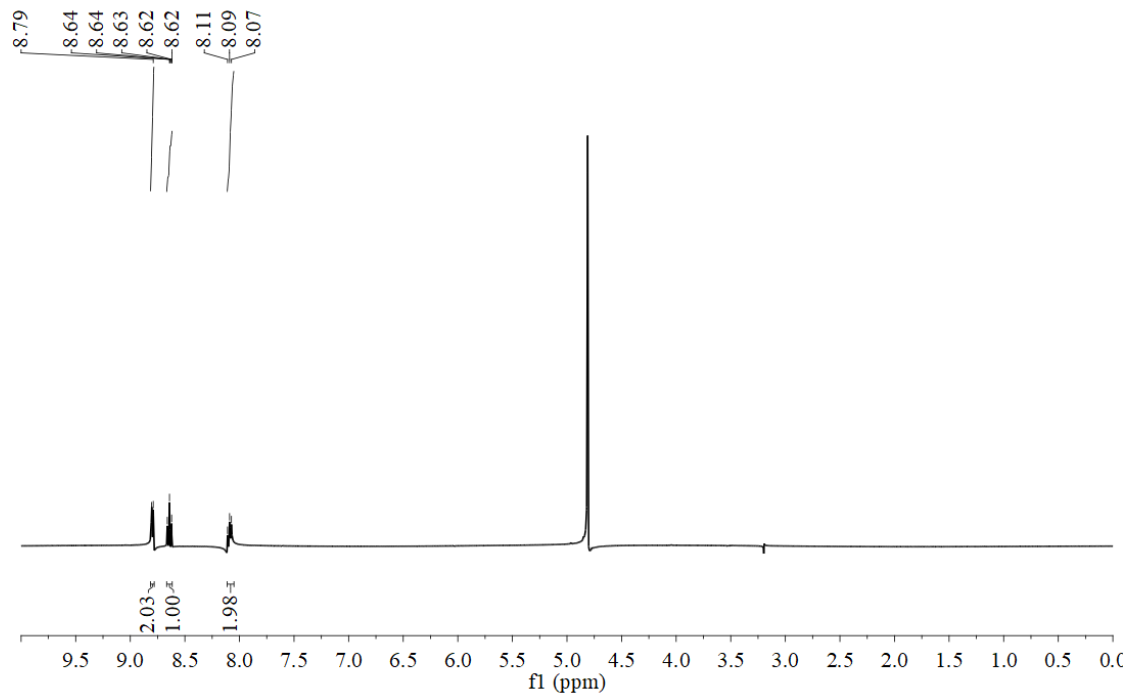

**Fig. S21**  $^1\text{H}$ NMR spectrum of HPyI.
